# Supplementary material for: Biophotovoltaics: oxygenic photosynthetic organisms in the world of bioelectrochemical systems
Source: Royal Society of Chemistry journal article supplement (doi:10.1039/c4ee03875d), 2015-01-01
Supplement: c4ee03875d2.xlsx [file c4ee03875d2.xlsx]

## Sheet: Fields of input
	Supp. Figure 2. Model for calculating BPV performance. The simple model used to generate the predicted achievable performances for BPVs in section 5 is included as an interactive supplement with all assumptions highlighted. The Excel file includes three worksheets for i) entering the data (Fields of input); ii) viewing the resulting current and power outputs, and percentage efficiency for the con…
	Please complete the filed with the yellow background
		Required filed	Validation of the required field
	Enter in this field the expected solar radiation at the ground level (SRG) in mW per square meter. Valid values are bigger than zero. As an example, the SRG in Oslo and Riyadh is expected to be 103000 and 263000 mW m-2, respectively (http://solargis.info/).		Value out of range
	Enter in this field the wavelength of the photosynthetic active radiation in nanometres (nm). The wavelengths of the solar radiation are expected to range from 190 nm to 2500 nm. However, the the midpoint of the PAR range is 560nm.		Value out of range
	Enter in this field the percentage of the light photon flux expected to be in the PAR range. Valid values range from >0% to 100%. Frequently the PAR is indicated to be roughly 50% of the available light photon flux.		Value out of range
	Enter in this field the percentage of the light photon flux intercepted by photosynthetic organisms. Valid values range from >0% to 100%. Experimental studies has demonstrated that the antennas of the photosynthetic apparatus could intercept up to 90% of the incident light photon flux.		Value out of range
	Enter in this field the number of photos required to split a molecule of water and generate two electrons. Valid values are equal or bigger than 4. The linear chain has a theoretical requirement of 4 moles of photons for generating 2 moles of electrons. However, a more conservative estimation suggests a value between 4 and 5 photons per pair of electrons.		Value out of range
	Enter in this field the expected metabolic loses. Valid values range from >0% to 100%. In a conservative scenario, we have estimated 33% of electrons generated by the photosynthetic light reactions are used for cellular metabolic processes and therefore are not available for generating electrical current. In the more optimistic scenario only 3% of those electrons are not available.		Value out of range
	Enter in this field the expected coulombic efficiency for exporting the electrons. Valid values range from >0% to 100%. Here we uses coulombic efficiencies of 60% or 95%.		Value out of range
	Enter in this field the expected anode to cathode potential (mV). Valid must be larger than 0 mV. In principle 850 mV is theoretically achievable. However, at peak power the largest difference in potential demonstrated is 315 mV (Xie et al., 2011), while power outputs based on the averaging potential difference from 26 BPV studies is 213 mV (ESI Table 1).		Value out of range

## Sheet: Results
	Based on the assumptions given in the "field of inputs" these are the expected results
		Estimated performance for an ideal BPV
	Current output (mA m-2)	#DIV/0!
	Power output (mW m-2)	#DIV/0!
	% of the initial power input	#DIV/0!	#DIV/0!

## Sheet: Computation sheet
			Note
	Light photon flux at the ground level (µE m-2 s-1)	0	Calculated by converting the SRG input at a certain wavelength of the PAR range. The SRG is divided by the Avogadro constant, speed of light and Plank constant and multiplied by the wavelength.
	Light photon flux in the PAR range (µE m-2 s-1)	0	Calculated by multiplying the entire light photon flux by the percentage of the light photon flux expected to be in the PAR range.
	Intercepted light photon flux (µE m-2 s-1)	0	Calculated by multiplying the PAR light photon flux by the percentage of the light intercepted by the antennas of the photosynthetic apparatus.
	Generation of electrons (µmol e- m-2 s-1)	#DIV/0!	Calculated by dividing the intercepted mole of PAR light photon flux for the number of photon required to perform the photolysis of water.
	Metabolic loses (µmol e- m-2 s-1)	#DIV/0!	Calculated by multiplying the electrons generated by a coefficient that describes (1 - %) of the metabolic loses.
	Coulumbic efficiencies (µmol e- m-2 s-1)	#DIV/0!	Calculated by multiplying the remaining electrons by the expected coulombic efficiency.
	Current output (mA m-2)	#DIV/0!	Calculated by multiplying the electron flux (µmol e- m-2 s-1) by the Faraday constant (96500 C mol-1) / 1000 = mC m-2 s-1 = mA m-2.
	Power output (mW m-2)	#DIV/0!	Calculated by multiplying the current time potential in Volt (mW = mA x Volt).
	% of the initial power input	#DIV/0!	Calculated by dividing the final power output by the initial SRG input.
	OK
	Value out of range
	Where do you live, on Venus?!?!
	.
	Nature's first green is gold!
